# Supplementary material
Source: PubMed Central journal article supplement (PMC3697504)
Supplement: AEM.00474-13_zam999104533so1.pdf [file AEM.00474-13_zam999104533so1.pdf]

**Farm ID** \_\_\_\_\_

**Visit #** \_\_\_\_\_

**Date** \_\_\_\_\_

**Questionnaire Completed by** \_\_\_\_\_

**A. GENERAL farm and management information**

**A.1. Size of farm:** \_\_\_\_\_ Acres

**A.2. Has the farm ever been organic?**

① YES →

② NO

From (month/year) \_\_\_\_\_ To (month/year) \_\_\_\_\_  
 What National Organic Program certification agent did you use  
 \_\_\_\_\_

**A.3. What crops were grown on this farm in the previous 3 years (if needed use Interviewer guide in Appendix 1 as a reminder)?**

\_\_\_\_\_

**A.4. What is your crop rotation cycle?** \_\_\_\_\_

**A.5. Was the field ever used for grazing?**

① YES →

② NO

| Field 1                    | Field 2                    | Field 3                    | Field 4                    |
|----------------------------|----------------------------|----------------------------|----------------------------|
| From (month/year)<br>_____ | From (month/year)<br>_____ | From (month/year)<br>_____ | From (month/year)<br>_____ |
| To (month/year)<br>_____   | To (month/year)<br>_____   | To (month/year)<br>_____   | To (month/year)<br>_____   |

Integrating National Resource Information And Food System Signals To Identify Novel Methods For Control Of  
Microbial Contamination In Spinach - **Questionnaire**

**A.6. Do you own your own farm equipment for all operations?**

① YES

② NO →

① Borrow

② Lease/rent

③ Other \_\_\_\_\_

**A.7. Do you clean farm equipment?**

① YES

② NO

**A.8. Do you have a staff year-round?**

① YES, approximately \_\_\_\_\_

② NO

**A.9. Do you have temporary workers?**

① YES, approximately \_\_\_\_\_

② NO

**A.10. Are portable toilets provided to staff/workers in the field?**

① YES →

② NO

How far are the toilets from the work area where the workers are located?  
List approximate distance \_\_\_\_\_

**A.11. Do you train staff/workers to use portable toilets?**

① YES

② NO

## Integrating National Resource Information And Food System Signals To Identify Novel Methods For Control Of Microbial Contamination In Spinach - Questionnaire

**A.12. Are there portable hand washing stations provided to staff/workers in the field?**

- ① YES  
② NO

**A.13. Does the farm irrigate?**

- ① YES  
② NO  
③ Weather dependent

**i. What type of irrigation is used (if applicable)?**

| Field 1     | Field 2     | Field 3     | Field 4     |
|-------------|-------------|-------------|-------------|
| Drip        | Drip        | Drip        | Drip        |
| Overhead    | Overhead    | Overhead    | Overhead    |
| Spray       | Spray       | Spray       | Spray       |
| Flood       | Flood       | Flood       | Flood       |
| Other _____ | Other _____ | Other _____ | Other _____ |

**ii. What is the source of water for irrigation (circle all that apply)?**

| Field 1             | Field 2             | Field 3             | Field 4             |
|---------------------|---------------------|---------------------|---------------------|
| Pond                | Pond                | Pond                | Pond                |
| Well                | Well                | Well                | Well                |
| Municipal           | Municipal           | Municipal           | Municipal           |
| River/Stream/Creek  | River/Stream/Creek  | River/Stream/Creek  | River/Stream/Creek  |
| Man Made Reservoirs | Man Made Reservoirs | Man Made Reservoirs | Man Made Reservoirs |
| Other _____         | Other _____         | Other _____         | Other _____         |

**A.14. Do you use any wildlife control (circle all that apply)?**

- ① YES →  
② NO

| Field 1          | Field 2          | Field 3          | Field 4          |
|------------------|------------------|------------------|------------------|
| Fences           | Fences           | Fences           | Fences           |
| Scarecrows       | Scarecrows       | Scarecrows       | Scarecrows       |
| Traps            | Traps            | Traps            | Traps            |
| Poison           | Poison           | Poison           | Poison           |
| Hunting          | Hunting          | Hunting          | Hunting          |
| Bombs, woodchuck | Bombs, woodchuck | Bombs, woodchuck | Bombs, woodchuck |
| Other _____      | Other _____      | Other _____      | Other _____      |

**A.15. The farm is located on what kind of terrain?**

| Field 1    | Field 2    | Field 3    | Field 4    |
|------------|------------|------------|------------|
| Flat       | Flat       | Flat       | Flat       |
| Valley     | Valley     | Valley     | Valley     |
| Sloped     | Sloped     | Sloped     | Sloped     |
| Steep      | Steep      | Steep      | Steep      |
| Hill       | Hill       | Hill       | Hill       |
| Don't know | Don't know | Don't know | Don't know |

**A.16. Does the farm have a buffer zone from neighbors, road ways, etc?**

- ① YES  
② NO

**i. If yes, what type of buffer zone?**

| Field 1     | Field 2     | Field 3     | Field 4     |
|-------------|-------------|-------------|-------------|
| Fence       | Fence       | Fence       | Fence       |
| Tree Line   | Tree Line   | Tree Line   | Tree Line   |
| Ditch       | Ditch       | Ditch       | Ditch       |
| Shrubbery   | Shrubbery   | Shrubbery   | Shrubbery   |
| Other _____ | Other _____ | Other _____ | Other _____ |
| Don't know  | Don't know  | Don't know  | Don't know  |

**A.17. Is the field in the general proximity (within 10 mile radius) of any of the following? If so, approximately how close is the nearest:**

|                                        | Field 1 | Field 2 | Field 3 | Field 4 |
|----------------------------------------|---------|---------|---------|---------|
| Dairy Farm                             |         |         |         |         |
| Beef Farm                              |         |         |         |         |
| Water Sources<br>(running or standing) |         |         |         |         |
| Landfill                               |         |         |         |         |
| Residential                            |         |         |         |         |
| Poultry Farm                           |         |         |         |         |
| Swine Farm                             |         |         |         |         |
| Forest                                 |         |         |         |         |
| Roadways                               |         |         |         |         |
| Other                                  |         |         |         |         |
| Don't know                             |         |         |         |         |

**B. CHANGEABLE management actions and routine surveillance****B.1. In what condition were the fields before planting of the spinach crop this season?**

| <b>Field 1</b>       | <b>Field 2</b>       | <b>Field 3</b>       | <b>Field 4</b>       |
|----------------------|----------------------|----------------------|----------------------|
| Fallow               | Fallow               | Fallow               | Fallow               |
| Rotavated            | Rotavated            | Rotavated            | Rotavated            |
| Tilled               | Tilled               | Tilled               | Tilled               |
| Cover crop<br>(type) | Cover crop<br>(type) | Cover crop<br>(type) | Cover crop<br>(type) |
| Hay                  | Hay                  | Hay                  | Hay                  |
| Other _____          | Other _____          | Other _____          | Other _____          |

**B.2. When was the current spinach crop planted?**

|      | <b>Field 1</b> | <b>Field 2</b> | <b>Field 3</b> | <b>Field 4</b> |
|------|----------------|----------------|----------------|----------------|
| Date |                |                |                |                |

**B.3. During the period since our last visit to the farm or during the previous 2 months, whichever is shorter,****i. has the soil been tilled, rotavated or aerated?**

| Field 1                | Field 2                | Field 3                | Field 4                |
|------------------------|------------------------|------------------------|------------------------|
| Yes, ___ days ago      |
| Not during this period |
| No, never              | No, never              | No, never              | No, never              |
| Don't know             | Don't know             | Don't know             | Don't know             |

**ii. has the farm irrigated its fields?**

| Field 1                | Field 2                | Field 3                | Field 4                |
|------------------------|------------------------|------------------------|------------------------|
| Yes, ___ days ago      |
| Not during this period |
| No, never              | No, never              | No, never              | No, never              |
| Don't know             | Don't know             | Don't know             | Don't know             |

**iii. has manure been applied to farm fields?**

| Field 1                | Field 2                | Field 3                | Field 4                |
|------------------------|------------------------|------------------------|------------------------|
| Yes, ___ days ago      |
| Not during this period |
| No, never              | No, never              | No, never              | No, never              |
| Don't know             | Don't know             | Don't know             | Don't know             |

**a. If yes, what was the source (circle all that apply)?**

| Field 1      | Field 2      | Field 3      | Field 4      |
|--------------|--------------|--------------|--------------|
| Dairy farm   | Dairy farm   | Dairy farm   | Dairy farm   |
| Feedlot      | Feedlot      | Feedlot      | Feedlot      |
| Swine farm   | Swine farm   | Swine farm   | Swine farm   |
| Poultry farm | Poultry farm | Poultry farm | Poultry farm |
| Other        | Other        | Other        | Other        |
| Don't know   | Don't know   | Don't know   | Don't know   |

**b. If yes, how long was the applied manure aged before spreading?**

| Field 1    | Field 2       | Field 3    | Field 4    |
|------------|---------------|------------|------------|
| ___ weeks  | ___ weeks ago | ___ weeks  | ___ weeks  |
| Don't know | Don't know    | Don't know | Don't know |

**iv. has compost been applied to farm fields?**

| Field 1                | Field 2                | Field 3                | Field 4                |
|------------------------|------------------------|------------------------|------------------------|
| Yes, ___ days ago      |
| Not during this period |
| No, never              | No, never              | No, never              | No, never              |
| Don't know             | Don't know             | Don't know             | Don't know             |

**v. has chemical/synthetic fertilizer been applied to farm fields?**

| Field 1                         | Field 2                         | Field 3                         | Field 4                         |
|---------------------------------|---------------------------------|---------------------------------|---------------------------------|
| Yes, _____type<br>_____days ago | Yes, _____type<br>_____days ago | Yes, _____type<br>_____days ago | Yes, _____type<br>_____days ago |
| Not during this period          |
| No, never                       | No, never                       | No, never                       | No, never                       |
| Don't know                      | Don't know                      | Don't know                      | Don't know                      |

**a. If yes, how was the fertilizer applied to the fields?**

| Field 1            | Field 2            | Field 3            | Field 4            |
|--------------------|--------------------|--------------------|--------------------|
| Fertigation        | Fertigation        | Fertigation        | Fertigation        |
| Foliar spray       | Foliar spray       | Foliar spray       | Foliar spray       |
| Ground application | Ground application | Ground application | Ground application |
| Other _____        | Other _____        | Other _____        | Other _____        |

**vi. have pesticides been applied to farm fields?**

| Field 1                | Field 2                | Field 3                | Field 4                |
|------------------------|------------------------|------------------------|------------------------|
| Yes, ___ days ago      |
| Not during this period |
| No, never              | No, never              | No, never              | No, never              |
| Don't know             | Don't know             | Don't know             | Don't know             |

**a. If yes, what was the type of pesticide applied?**

| Field 1     | Field 2     | Field 3     | Field 4     |
|-------------|-------------|-------------|-------------|
| Herbicide   | Herbicide   | Herbicide   | Herbicide   |
| Fungicide   | Fungicide   | Fungicide   | Fungicide   |
| Insecticide | Insecticide | Insecticide | Insecticide |
| Other _____ | Other _____ | Other _____ | Other _____ |



**b. If yes, how was the pesticide applied to fields?**

| Field 1           | Field 2           | Field 3           | Field 4           |
|-------------------|-------------------|-------------------|-------------------|
| Low volume spray  | Low volume spray  | Low volume spray  | Low volume spray  |
| High volume spray | High volume spray | High volume spray | High volume spray |
| Fog               | Fog               | Fog               | Fog               |
| Foliar            | Foliar            | Foliar            | Foliar            |
| Soil              | Soil              | Soil              | Soil              |
| Other _____       | Other _____       | Other _____       | Other _____       |

**vii. have domestic animals been observed in the farm fields?**

| Field 1                        | Field 2                        | Field 3                        | Field 4                        |
|--------------------------------|--------------------------------|--------------------------------|--------------------------------|
| Yes, ___species<br>___days ago | Yes, ___species<br>___days ago | Yes, ___species<br>___days ago | Yes, ___species<br>___days ago |
| Not during this period         |
| No, never                      | No, never                      | No, never                      | No, never                      |
| Don't know                     | Don't know                     | Don't know                     | Don't know                     |

**viii. has wildlife been observed in the farm fields?**

| Field 1                        | Field 2                        | Field 3                        | Field 4                        |
|--------------------------------|--------------------------------|--------------------------------|--------------------------------|
| Yes, ___species<br>___days ago | Yes, ___species<br>___days ago | Yes, ___species<br>___days ago | Yes, ___species<br>___days ago |
| Not during this period         |
| No, never                      | No, never                      | No, never                      | No, never                      |
| Don't know                     | Don't know                     | Don't know                     | Don't know                     |

**ix. have staff members/temporary workers been in the farm field?**

| Field 1                     | Field 2                     | Field 3                     | Field 4                     |
|-----------------------------|-----------------------------|-----------------------------|-----------------------------|
| Yes, staff<br>___days ago   | Yes, staff<br>___days ago   | Yes, staff<br>___days ago   | Yes, staff<br>___days ago   |
| Yes, workers<br>___days ago | Yes, workers<br>___days ago | Yes, workers<br>___days ago | Yes, workers<br>___days ago |
| Not during this period      |
| No, never                   | No, never                   | No, never                   | No, never                   |
| Don't know                  | Don't know                  | Don't know                  | Don't know                  |

Integrating National Resource Information And Food System Signals To Identify Novel Methods For Control Of Microbial Contamination In Spinach - Questionnaire

**x. has training on food safety been provided to staff members/temporary workers?**

- ① YES
- ② NO

**xi. has any routine microbial testing been done on your farm?**

- ① YES
- ② NO

**a. Who requires it to be completed?**

- ① Owner
- ② Fresh cut processing buyers
- ③ Retail buyers
- ④ Co-Op buyers
- ⑤ Other \_\_\_\_\_

**b. What organisms were tested for and when; the results of the testing if known?**

|                               | Field 1 |        | Field 2 |        | Field 3 |        | Field 4 |        |
|-------------------------------|---------|--------|---------|--------|---------|--------|---------|--------|
|                               | date    | result | date    | result | date    | result | date    | result |
| Coliforms                     |         |        |         |        |         |        |         |        |
| <i>E. coli</i> generic _____  |         |        |         |        |         |        |         |        |
| <i>E. coli</i> O157           |         |        |         |        |         |        |         |        |
| <i>E. coli</i> STEC           |         |        |         |        |         |        |         |        |
| <i>Listeria monocytogenes</i> |         |        |         |        |         |        |         |        |
| <i>Salmonella</i>             |         |        |         |        |         |        |         |        |
| Other _____                   |         |        |         |        |         |        |         |        |

**c. What was tested on the farm?**

| Area 1           | Area 2           | Area 3           | Area 4           |
|------------------|------------------|------------------|------------------|
| Produce          | Produce          | Produce          | Produce          |
| Irrigation Water | Irrigation Water | Irrigation Water | Irrigation Water |
| Spray Water      | Spray Water      | Spray Water      | Spray Water      |
| Soil             | Soil             | Soil             | Soil             |
| Equipment        | Equipment        | Equipment        | Equipment        |

**Appendix 1.****Interviewer guide****1. Crop Kind**

- |                                            |                                             |                                     |                                                    |
|--------------------------------------------|---------------------------------------------|-------------------------------------|----------------------------------------------------|
| <input type="checkbox"/> Alfalfa           | <input type="checkbox"/> Celery             | <input type="checkbox"/> Mango      | <input type="checkbox"/> Pumpkins                  |
| <input type="checkbox"/> Apples            | <input type="checkbox"/> Cherries           | <input type="checkbox"/> Melons     | <input type="checkbox"/> Radish                    |
| <input type="checkbox"/> Arugula           | <input type="checkbox"/> Corn (sweet)       | <input type="checkbox"/> Nuts       | <input type="checkbox"/> Red Leaf Lettuce          |
| <input type="checkbox"/> Baby Leaf Lettuce | <input type="checkbox"/> Cucumbers          | <input type="checkbox"/> Oats       | <input type="checkbox"/> Romaine Lettuce           |
| <input type="checkbox"/> Barley            | <input type="checkbox"/> Endives            | <input type="checkbox"/> Onions     | <input type="checkbox"/> Spinach                   |
| <input type="checkbox"/> Beans             | <input type="checkbox"/> Escarole           | <input type="checkbox"/> Oranges    | <input type="checkbox"/> Spring Mix                |
| <input type="checkbox"/> Beats             | <input type="checkbox"/> Garlic             | <input type="checkbox"/> Papaya     | <input type="checkbox"/> Sprouted Seeds            |
| <input type="checkbox"/> Berries           | <input type="checkbox"/> Green Leaf Lettuce | <input type="checkbox"/> Peaches    | <input type="checkbox"/> Squash                    |
| <input type="checkbox"/> Broccoli          | <input type="checkbox"/> Green Onions       | <input type="checkbox"/> Peas       | <input type="checkbox"/> Tomatoes                  |
| <input type="checkbox"/> Buttered Lettuce  | <input type="checkbox"/> Herbs              | <input type="checkbox"/> Peppers    | <input type="checkbox"/> Turnip                    |
| <input type="checkbox"/> Cabbage           | <input type="checkbox"/> Iceberg Lettuce    | <input type="checkbox"/> Pineapples | <input type="checkbox"/> Wheat                     |
| <input type="checkbox"/> Chard             | <input type="checkbox"/> Kale               | <input type="checkbox"/> Potatoes   | <input type="checkbox"/> Other (please list below) |
